# Supplementary material
Source: PubMed Central journal article supplement (PMC3306838)
Supplement: NIHMS351114-supplement-supplement_1.pdf [file NIHMS351114-supplement-supplement_1.pdf]

## Supplementary Appendix

This appendix has been provided by the author to give readers additional information about his work.

Supplement to: Maris JM. Recent advances in neuroblastoma. N Engl J Med 2010;362:2202-11.

**ON-LINE SUPPLEMENT**

**MEDICAL PROGRESS**

**Recent Advances in Neuroblastoma**

John M. Maris, M.D.

Center for Childhood Cancer Research

The Children's Hospital of Philadelphia

The University of Pennsylvania School of Medicine

The Abramson Family Cancer Research Institute

Philadelphia, PA 19104-4318

Corresponding author:

John M. Maris, M.D.

The Children's Hospital of Philadelphia

Division of Oncology

ARC 907A

3615 Civic Center Boulevard

Philadelphia, PA 19104-4318

Voice: 215 590-5244

Fax: 267 426-0685

Email: [maris@chop.edu](mailto:maris@chop.edu)

## Timeline of Investigations on Neuroblastoma

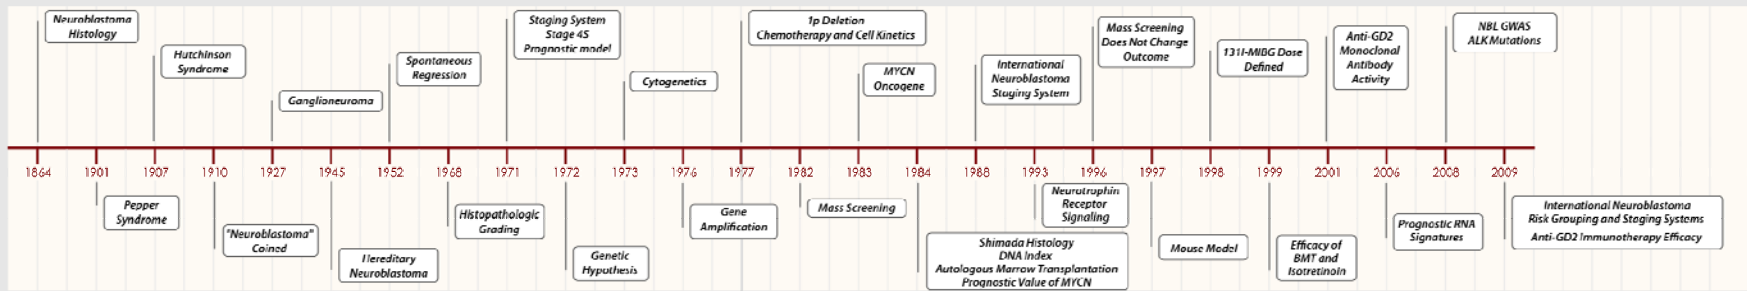

See table below for further description and references.

**Table of important advances in neuroblastoma.**

| <b>Year</b> | <b>Investigator(s)</b>                   | <b>Contribution</b>                                                                                 | <b>Reference</b> |
|-------------|------------------------------------------|-----------------------------------------------------------------------------------------------------|------------------|
| 1864        | Virchow                                  | First description of neuroblastoma histology                                                        | 1                |
| 1901        | Pepper                                   | First description of massive liver involvement associated with suprarenal mass (Pepper syndrome)    | 2                |
| 1907        | Hutchinson                               | First description of neuroblastoma metastases to skull/orbits (Hutchinson syndrome)                 | 3                |
| 1910        | Wright                                   | Coined term "neuroblastoma" and described bone marrow rosettes                                      | 4                |
| 1927        | Cushing                                  | First description of maturation to ganglioneuroma                                                   | 5                |
| 1945        | Dodge                                    | First description of hereditary neuroblastoma                                                       | 6                |
| 1952        | Stewart and Everson                      | First descriptions of spontaneous regression of neuroblastoma                                       | 7, 8             |
| 1967        | Bill and Koop                            | First international interdisciplinary conference on the biology of neuroblastoma                    | 9                |
| 1968        | Beckwith                                 | First description of histopathologic grading                                                        | 10               |
| 1971        | Evans                                    | First neuroblastoma staging system                                                                  | 11               |
| 1971        | D'Angio and Evans                        | Definitive description and definition of the Stage 4S phenotype                                     | 12               |
| 1971        | Breslow                                  | First prognostic model for predicting neuroblastoma outcome                                         | 13               |
| 1972        | Knudson and Strong                       | Genetic hypothesis for initiation of neuroblastoma tumorigenesis                                    | 14               |
| 1973        | Biedler                                  | First description of neuroblastoma cytogenetics                                                     | 15               |
| 1974        | Bolande                                  | Unifying hypothesis for congenital disorders of neural crest including neuroblastoma                | 16               |
| 1976        | Biedler                                  | First description of HSRs and DMs as manifestation of gene amplification                            | 17               |
| 1977        | Brodeur                                  | First description of chromosome arm 1p deletions                                                    | 18               |
| 1977        | Hayes                                    | Correlation of cell kinetic and clinical response to chemotherapy in neuroblastoma                  | 19               |
| 1982        | Sawada                                   | First description of screening for neuroblastoma in newborns                                        | 20               |
| 1983        | Schwab                                   | Discovery of the MYCN oncogene                                                                      | 21               |
| 1984        | Shimada                                  | Description and implementation of the Shimada histology grading system                              | 22               |
| 1984        | Look                                     | Demonstration of the prognostic value of DNA index (ploidy)                                         | 23               |
| 1984        | August                                   | First report of autologous transplantation for high-risk neuroblastoma                              | 24               |
| 1984        | Brodeur and Seeger                       | Demonstration of the prognostic value of MYCN amplification                                         | 25, 26           |
| 1988        | Brodeur and colleagues                   | First international neuroblastoma staging system                                                    | 27               |
| 1993        | Nakagawara                               | Demonstration of the central role of neurotrophin receptor signaling                                | 28, 29           |
| 1996        | Woods and Schilling                      | Showed that screening for neuroblastoma does not change outcome                                     | 30, 31           |
| 1997        | Weiss and Bishop                         | Development of a mouse model of neuroblastoma                                                       | 32               |
| 1998        | Matthay                                  | Demonstration that targeted radiotherapy with <sup>131</sup> I-MIBG has anti-neuroblastoma activity | 33               |
| 1999        | Matthay and Reynolds                     | Phase III trial showing efficacy of BMT and 13-cis retinoic acid                                    | 34               |
| 2001        | Kushner and Cheung                       | Demonstration that anti-GD2 monoclonal antibody has anti-neuroblastoma activity                     | 35               |
| 2005        | Attiyeh                                  | Demonstration of 1p36 and 11q23 LOH as relevant prognostic biomarkers                               | 36               |
| 2006        | Wei, Ohira, Asgharzadeh and Oberthuer    | Demonstration of prognostic RNA signatures                                                          | 37-40            |
| 2008        | Maris and colleagues                     | Discovery of common variations predisposing to sporadic neuroblastoma                               | 41-43            |
| 2008        | Mosse, Janoueix-Lerosey, George and Chen | Discovery of ALK as the major familial neuroblastoma gene and as a mutated oncogene                 | 44-47            |
| 2009        | Cohn, Montclair and Pearson              | International Neuroblastoma Risk Grouping and Staging Systems                                       | 48, 49           |
| 2009        | Yu                                       | Demonstration that anti-GD2 immunotherapy improves survival                                         | 50               |

**References**

1. Virchow R. Hyperplasie der Zirbel und der Nebennieren. Die Krankhaften Geschwulste 1864;11:149-50.
2. Pepper W. A study of congenital sarcoma of the liver and suprarenal with the report of a case. . Am J Med Sci 1901;121:287-99.
3. Hutchinson R. Suprarenal sarcoma in children with metastases to skull. Quart J Med 1907;1:33-8.
4. Wright JH. Neurocytoma or neuroblastoma, a kind of tumor not generally recognized. . Journal of Experimental Medicine 1910;12:556-61.
5. Cushing H, Wolbach SB. The Transformation of a Malignant Paravertebral Sympathicoblastoma into a Benign Ganglioneuroma. Am J Pathol 1927;3:203-16.
6. Dodge HJ, Beuner MC. Neuroblastoma of the adrenal medulla in sibilings. Rocky Mt Med 1945;42:35-8.
7. Stewart FW. Experiences in spontaneous regression of neoplastic disease in man [Bertner lecture]. Texas Rep Biol & Med 1952;10:239-53.
8. Everson T, Cole W. Spontaneous regression of cancer: Preliminary report. Annals of Surgery 1956;144:366.
9. Bill AH, Koop CE. Conference on The Biology of Neuroblastoma. In; 1967: Journal of Pediatric Surgery; 1967.
10. Beckwith JB, Martin RF. Observations on the histopathology of neuroblastomas. J Pediatr Surg 1968;3:106-10.
11. Evans AE, D'Angio GJ, Randolph J. A proposed staging for children with neuroblastoma. Children's cancer study group A. Cancer 1971;27:374-8.
12. D'Angio GJ, Evans AE, Koop CE. Special pattern of widespread neuroblastoma with a favourable prognosis. Lancet 1971;1:1046-9.
13. Breslow N, McCann B. Statistical estimation of prognosis for children with neuroblastoma. Cancer Research 1971;31:2098-103.
14. Knudson AGJ, Strong LC. Mutation and cancer: Neuroblastoma and pheochromocytoma. American Journal of Human Genetics 1972;24:514-22.
15. Biedler JL, Helson L, Spengler BA. Morphology and growth, tumorigenicity, and cytogenetics of human neuroblastoma cells in continuous culture. Cancer Research 1973;33:2643-52.
16. Bolande RP. The neurocristopathies: A unifying concept of disease arising in neural crest maldevelopment. Human Pathology 1974;5:409-29.
17. Biedler JL, Spengler BA. A novel chromosome abnormality in human neuroblastoma and antifolate-resistant Chinese hamster cell lines in culture. J Natl Cancer Inst 1976;57:683-95.
18. Brodeur GM, Sekhon GS, Goldstein MN. Chromosomal aberrations in human neuroblastomas. Cancer 1977;40:2256-63.

19. Hayes FA, Green AA, Mauer AM. Correlation of cell kinetic and clinical response to chemotherapy in disseminated neuroblastoma. *Cancer Res* 1977;37:3766-70.
20. Sawada T, Todo S, Fujita K, Iino S, Imashuku S, Kusunoki T. Mass screening of neuroblastoma in infancy. *Am J Dis Child* 1982;136:710-2.
21. Schwab M, Alitalo K, Klempnauer KH, et al. Amplified DNA with limited homology to myc cellular oncogene is shared by human neuroblastoma cell lines and a neuroblastoma tumour. *Nature* 1983;305:245-8.
22. Shimada H, Chatten J, Newton WA, Jr., et al. Histopathologic prognostic factors in neuroblastic tumors: Definition of subtypes of ganglioneuroblastoma and an age-linked classification of neuroblastomas. *Journal of the National Cancer Institute* 1984;73:405-13.
23. Look AT, Hayes FA, Nitschke R, McWilliams NB, Green AA. Cellular DNA content as a predictor of response to chemotherapy in infants with unresectable neuroblastoma. *New England Journal of Medicine* 1984;311:231-5.
24. August CS, Serota FT, Koch PA, et al. Treatment of advanced neuroblastoma with supralesional chemotherapy, radiation and allogeneic or autologous marrow reconstitution. *Journal of Clinical Oncology* 1984;2:609-16.
25. Brodeur G, Seeger RC, Schwab M, Varmus HE, Bishop JM. Amplification of N-myc in untreated human neuroblastomas correlates with advanced disease stage. *Science* 1984;224:1121-4.
26. Seeger RC, Brodeur GM, Sather H, et al. Association of multiple copies of the N-myc oncogene with rapid progression of neuroblastomas. *New England Journal of Medicine* 1985;313:1111-6.
27. Brodeur GM, Seeger RC, Barrett A, et al. International criteria for diagnosis, staging, and response to treatment in patients with neuroblastoma. *J Clin Oncol* 1988;6:1874-81.
28. Nakagawara A, Arima-Nakagawara M, Scavarda NJ, Azar CG, Cantor AB, Brodeur GM. Association between high levels of expression of the TRK gene and favorable outcome in human neuroblastoma. *New England Journal of Medicine* 1993;328:847-54.
29. Nakagawara A, Azar CG, Scavarda NJ, Brodeur GM. Expression and function of TRK-B and BDNF in human neuroblastomas. *Molecular and Cellular Biology* 1994;14:759-67.
30. Woods WG, Tuchman M, Robison LL, et al. A population-based study of the usefulness of screening for neuroblastoma. *Lancet* 1996;348:1682-7.
31. Schilling FH, Spix C, Berthold F, et al. Neuroblastoma screening at one year of age. *N Engl J Med* 2002;346:1047-53.
32. Weiss WA, Aldape K, Mohapatra G, Feuerstein BG, Bishop JM. Targeted expression of MYCN causes neuroblastoma in transgenic mice. *EMBO Journal* 1997;16:2985-95.
33. Matthay KK, DeSantes K, Hasegawa B, et al. Phase I dose escalation of 131I-metaiodobenzylguanidine with autologous bone marrow support in refractory neuroblastoma. *Journal of Clinical Oncology* 1998;16:229-36.

34. Matthay KK, Villablanca JG, Seeger RC, et al. Treatment of high-risk neuroblastoma with intensive chemotherapy, radiotherapy, autologous bone marrow transplantation, and 13-cis-retinoic acid. Children's Cancer Group. *New England Journal of Medicine* 1999;341:1165-73.
35. Kushner BH, Kramer K, Cheung NK. Phase II trial of the anti-GD2 monoclonal antibody 3F8 and granulocyte-macrophage colony-stimulating factor for neuroblastoma. *J Clin Oncol* 2001;19:4189-94.
36. Attiyeh EF, London WB, Mosse YP, et al. Chromosome 1p and 11q deletions and outcome in neuroblastoma. *N Engl J Med* 2005;353:2243-53.
37. Asgharzadeh S, Pique-Regi R, Sposto R, et al. Prognostic significance of gene expression profiles of metastatic neuroblastomas lacking MYCN gene amplification. *J Natl Cancer Inst* 2006;98:1193-203.
38. Oberthuer A, Berthold F, Warnat P, et al. Customized oligonucleotide microarray gene expression-based classification of neuroblastoma patients outperforms current clinical risk stratification. *J Clin Oncol* 2006;24:5070-8.
39. Ohira M, Oba S, Nakamura Y, et al. Expression profiling using a tumor-specific cDNA microarray predicts the prognosis of intermediate risk neuroblastomas. *Cancer Cell* 2005;7:337-50.
40. Wei JS, Greer BT, Westermann F, et al. Prediction of clinical outcome using gene expression profiling and artificial neural networks for patients with neuroblastoma. *Cancer Res* 2004;64:6883-91.
41. Maris JM, Mosse YP, Bradfield JP, et al. Chromosome 6p22 locus associated with clinically aggressive neuroblastoma. *N Engl J Med* 2008;358:2585-93.
42. Capasso M, Devoto M, Hou C, et al. Common variations in BARD1 influence susceptibility to high-risk neuroblastoma. *Nat Genet* 2009.
43. Diskin SJ, Hou C, Glessner JT, et al. Copy number variation at 1q21.1 associated with neuroblastoma. *Nature* 2009;459:987-91.
44. Chen Y, Takita J, Choi YL, et al. Oncogenic mutations of ALK kinase in neuroblastoma. *Nature* 2008;455:971-4.
45. George RE, Sanda T, Hanna M, et al. Activating mutations in ALK provide a therapeutic target in neuroblastoma. *Nature* 2008;455:975-8.
46. Janoueix-Lerosey I, Lequin D, Brugieres L, et al. Somatic and germline activating mutations of the ALK kinase receptor in neuroblastoma. *Nature* 2008;455:967-70.
47. Mosse YP, Laudenslager M, Longo L, et al. Identification of ALK as a major familial neuroblastoma predisposition gene. *Nature* 2008;455:930-5.
48. Cohn SL, Pearson AD, London WB, et al. The International Neuroblastoma Risk Group (INRG) Classification System: An INRG Task Force Report. *J Clin Oncol* 2008.
49. Monclair T, Brodeur GM, Ambros PF, et al. The International Neuroblastoma Risk Group (INRG) Staging System: An INRG Task Force Report. *J Clin Oncol* 2008.
50. Yu AL, Gilman AL, Ozkaynak MF, et al. A phase III randomized trial of the chimeric anti-GD2 antibody ch14.18 with GM-CSF and IL2 as immunotherapy following dose intensive chemotherapy for high-risk

neuroblastoma: Children's Oncology Group (COG) study ANBL0032. Journal of Clinical Oncology 2009;27:Abstr 10067z.
